# Supplementary material for: Progranulin deficiency causes impairment of autophagy and TDP-43 accumulation
Source: PubMed Central journal article supplement — J Exp Med. 2017 Sep 4;214(9):2611–28. doi: 10.1084/jem.20160999 (PMC5584112; doi:10.1084/jem.20160999), 2017-09-04
Supplement: JEM_20160999_sm.pdf [file JEM_20160999_sm.pdf]

SUPPLEMENTAL MATERIAL

Chang et al., <https://doi.org/10.1084/jem.20160999>

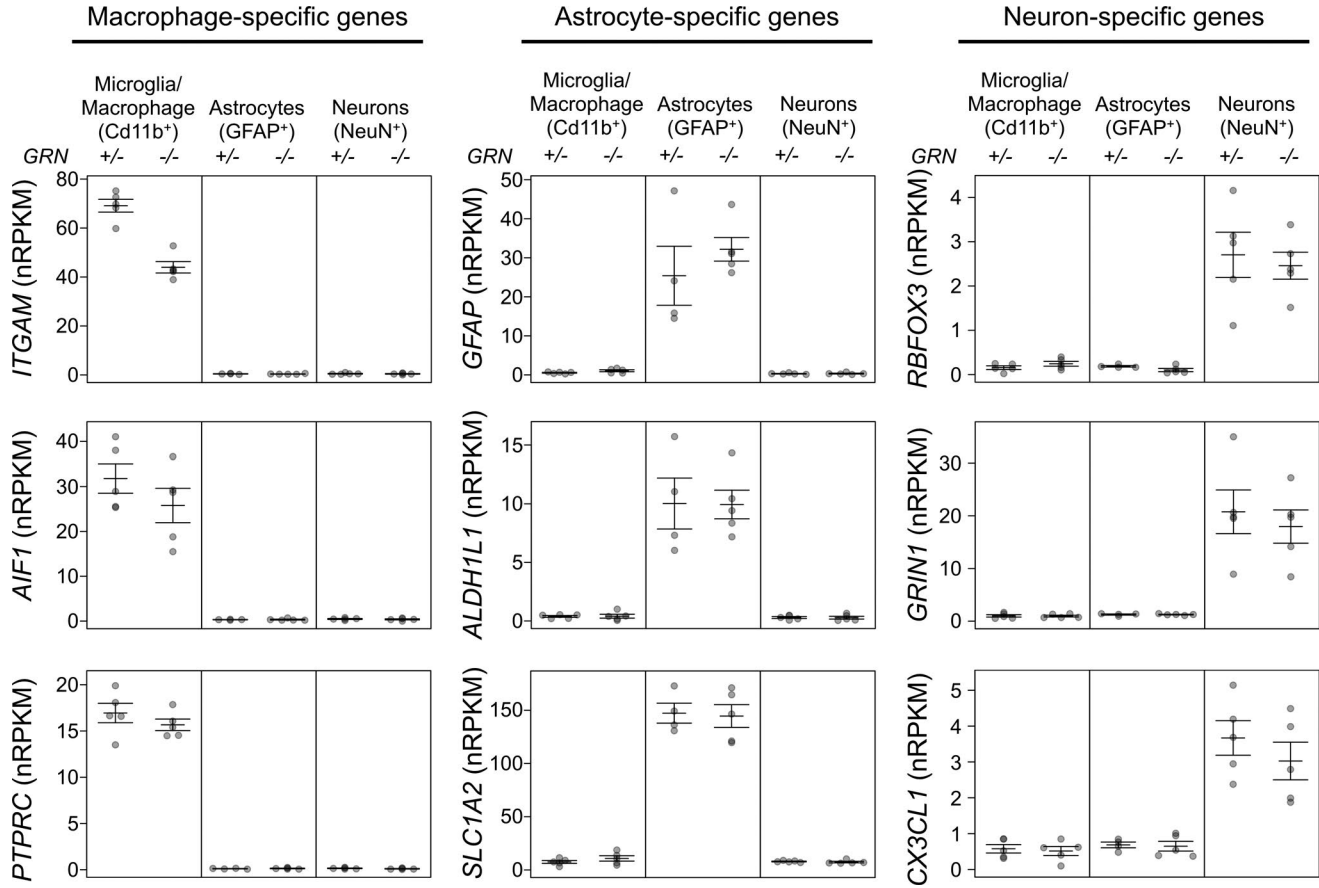

Figure S1. **Expression of representative cell-type-specific genes.** Normalized reads per kilobase of transcript per million mapped reads (nRPKM) of representative macrophage-specific (left), astrocyte-specific (middle), and neuron-specific (right) genes in sorted cells from *GRN*<sup>+/-</sup> and *GRN*<sup>-/-</sup> cortex. *n* = 5 mice from one experiment for all groups except *GRN*<sup>+/-</sup> astrocytes (*n* = 4 mice). Error bars represent mean ± SEM.

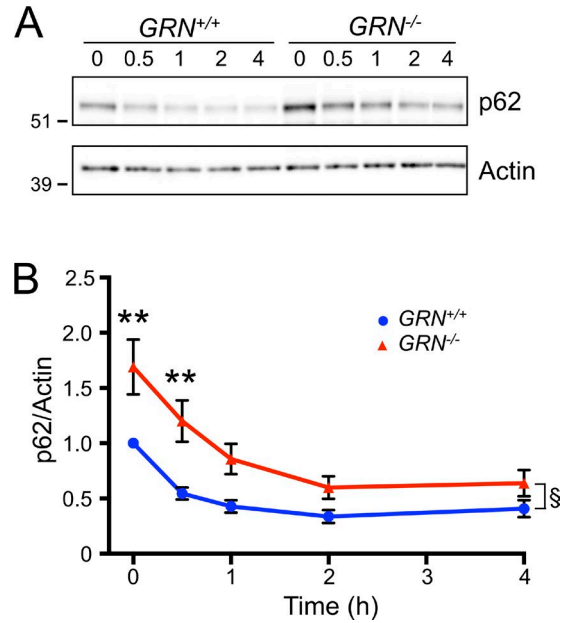

Figure S2. **Accumulation of p62 in *GRN*<sup>-/-</sup> BMDMs.** (A) Representative Western blot from *n* = 4 independent experiments of cell lysates from *GRN*<sup>+/+</sup> and *GRN*<sup>-/-</sup> BMDMs starved for the indicated time and probed for p62 and actin. The actin (loading control) immunoblots shown in Figs. 3 D and S2 A are identical; this actin immunoblot, as well as LC3 (Fig. 3 D) and p62 (Fig. S2 A), were obtained by reprobing of the same Western blot. Molecular mass is indicated in kilodaltons. (B) Quantification of p62 levels from experiments as in A. *n* = 4 independent experiments. §, *P* = 0.0018 for *GRN*<sup>-/-</sup> versus *GRN*<sup>+/+</sup> using two-way ANOVA and Sidak's multiple comparisons test (0 h = \*\*, *P* < 0.01; 0.5 h = \*\*, *P* < 0.01). Error bars represent mean ± SEM.

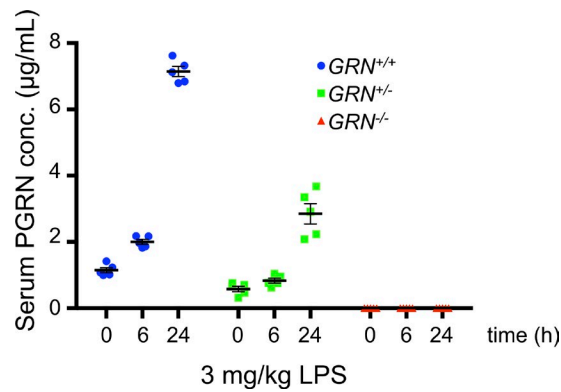

Figure S3. **Serum PGRN concentrations in *GRN*<sup>+/+</sup> (circles) and *GRN*<sup>-/-</sup> (triangles) mice in response to LPS.** *n* = 5 mice per group from one experiment. Error bars represent mean ± SEM.

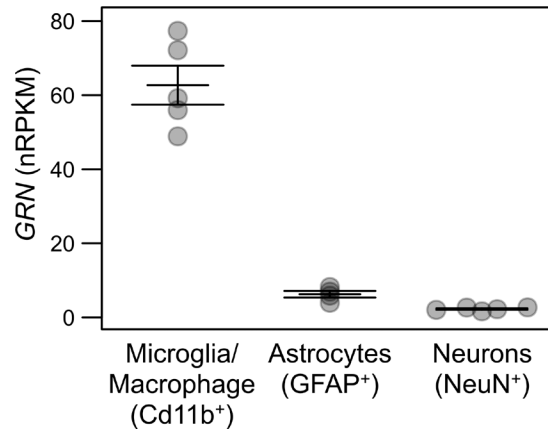

Figure S4. **Cell-type-specific expression of *GRN*.** Counts of sorted microglia/macrophages, astrocytes, and neurons from *GRN*<sup>+/-</sup> cortex expressed as normalized reads per kilobase of transcript per million mapped reads (nRPKM). *n* = 5 mice per group from five experiments. Error bars represent mean ± SEM.

Table S1. **Gene expression changes in *GRN*<sup>+/-</sup>**

|    | Gene symbol     | Gene name                                            | Log <sub>2</sub> (fold change) | Adjusted p-value |
|----|-----------------|------------------------------------------------------|--------------------------------|------------------|
| 1  | <i>GRN</i>      | Granulin                                             | -1                             | 5.96E-08         |
| 2  | <i>NDN</i>      | Necdin                                               | -0.918                         | 0.0000129        |
| 3  | <i>UCP2</i>     | Uncoupling protein 2 (mitochondrial, proton carrier) | -0.668                         | 0.00027          |
| 4  | <i>KRT12</i>    | Keratin 12                                           | -0.938                         | 0.00432          |
| 5  | <i>NNT</i>      | Nicotinamide nucleotide transhydrogenase             | -0.657                         | 0.0265           |
| 6  | <i>TEAD1</i>    | TEA domain family member 1                           | -0.38                          | 0.0441           |
| 7  | <i>EPN3</i>     | Epsin 3                                              | -0.885                         | 0.0456           |
| 8  | <i>DAB2</i>     | Disabled homolog 2                                   | -0.505                         | 0.0456           |
| 9  | <i>ARHGAP27</i> | Rho GTPase activating protein 27                     | -0.295                         | 0.0456           |
| 10 | <i>FAM171A2</i> | Family with sequence similarity 171, member A2       | -0.218                         | 0.0456           |

List of genes down-regulated in *GRN*<sup>-/-</sup> brains relative to *GRN*<sup>+/-</sup> brains, listed by rank in increasing p-value. *n* = 5 mice per group from one experiment.

Table S2. **Gene expression enrichment in *GRN*<sup>-/-</sup> cortex**

|   | GO cellular component complete                              | No. of genes in cellular component group | No. of genes from the experimental dataset | Expected no. of genes | Fold enrichment | P-value  |
|---|-------------------------------------------------------------|------------------------------------------|--------------------------------------------|-----------------------|-----------------|----------|
| 1 | Vacuole (GO: 0005773)                                       | 500                                      | 54                                         | 10.15                 | >5              | 5.86E-20 |
| 2 | Lytic vacuole (GO: 0000323)                                 | 429                                      | 50                                         | 8.71                  | >5              | 1.07E-19 |
| 3 | Lysosome (GO: 0005764)                                      | 429                                      | 50                                         | 8.71                  | >5              | 1.07E-19 |
| 4 | Proton-transporting two-sector ATPase complex (GO: 0016469) | 43                                       | 8                                          | 0.87                  | >5              | 4.25E-03 |
| 5 | Blood microparticle (GO: 0072562)                           | 103                                      | 11                                         | 2.09                  | >5              | 1.33E-02 |
| 6 | NADPH oxidase complex (GO: 0043020)                         | 9                                        | 4                                          | 0.18                  | >5              | 4.58E-02 |

GO cellular component enrichment analysis of genes up-regulated more than fivefold in *GRN*<sup>-/-</sup> brains relative to *GRN*<sup>+/-</sup> brains, ranked by p-value. *n* = 5 mice per group from one experiment.
